# Supplementary material
Source: PubMed Central journal article supplement (PMC4140159)

## SUPPLEMENTARY DATA

### Exenatide:

The Investigator's brochure from Eli Lilly and Company ([http://www.accessdata.fda.gov/drugsatfda\\_docs/label/2009/021773s9s11s18s22s251bl.pdf](http://www.accessdata.fda.gov/drugsatfda_docs/label/2009/021773s9s11s18s22s251bl.pdf)) indicates that the 'mean apparent clearance of exenatide in humans is 9.1L/h and the mean terminal half-life is 2.4 h. These pharmacokinetic characteristics of exenatide are independent of the dose. In most individuals, exenatide concentrations are measurable for approximately 10 h post-dose.

### Sitagliptin:

The Investigator's brochure from Merck ([http://www.accessdata.fda.gov/drugsatfda\\_docs/label/2006/0219951bl.pdf](http://www.accessdata.fda.gov/drugsatfda_docs/label/2006/0219951bl.pdf)) indicates that after 'oral administration of a 100 mg dose to healthy volunteers, the apparent terminal half-life (t<sub>1/2</sub>) was 12.4 hours. The pharmacokinetics were similar in type 2 diabetics'.

### Glimepiride:

The Investigator's brochure from Sanofi-Aventis ([http://www.accessdata.fda.gov/drugsatfda\\_docs/label/2009/020496s0211bl.pdf](http://www.accessdata.fda.gov/drugsatfda_docs/label/2009/020496s0211bl.pdf)) indicates the half-life of glimepiride obtained from a dose-proportionality study in type 2 diabetes is  $5.0 \pm 2.5$  hr for single dose and  $9.2 \pm 3.6$  hrs for multiple-dose administration up to 4 mg (the maximum dose in our study). Glimepiride is completely metabolized after oral dosing.

We, therefore, used 5 days off drug to allow >10 half-lives for drug clearance to ensure no active drug would remain in the subjects.

SUPPLEMENTARY DATA

**Supplementary Figure 1.** Flowchart describing subject recruitment, randomization and disposition of all the trial participants.

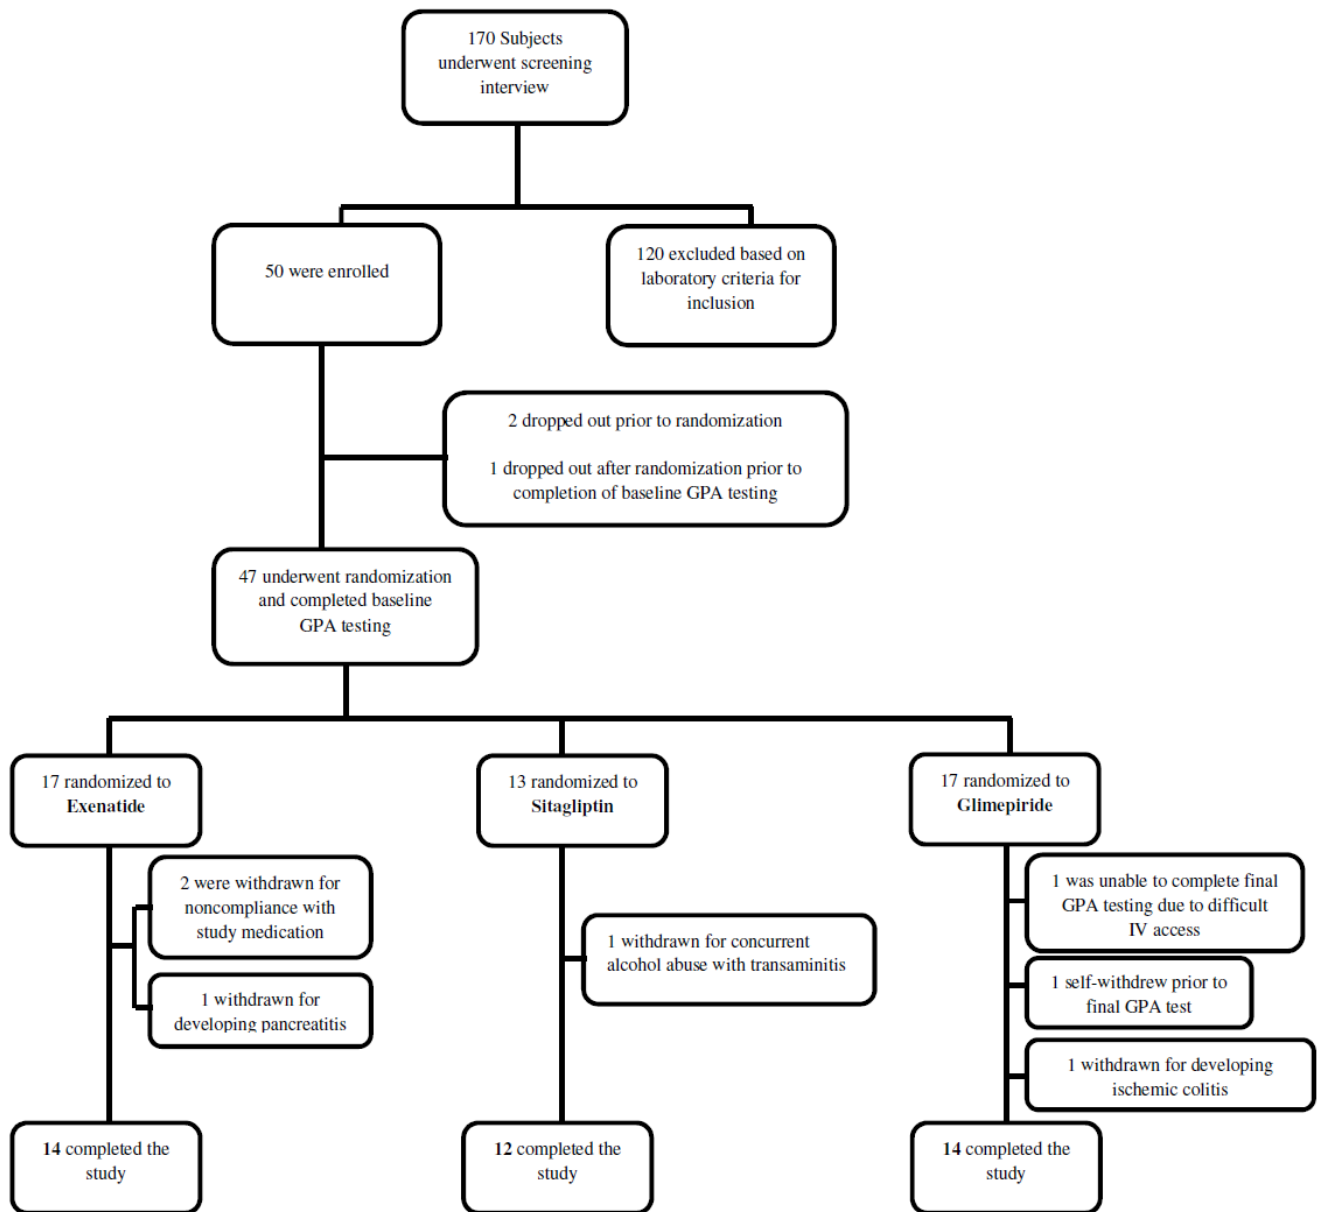

SUPPLEMENTARY DATA

**Supplementary Figure 2.** Plasma levels of glucose (top panel), insulin (middle panel) and GLP-1 (bottom panel) during the oral glucose tolerance test at baseline (open) and after 5 months (black) of therapy with exenatide (left, squares), sitagliptin (middle, circles) or glimepiride (right, triangles) panel.

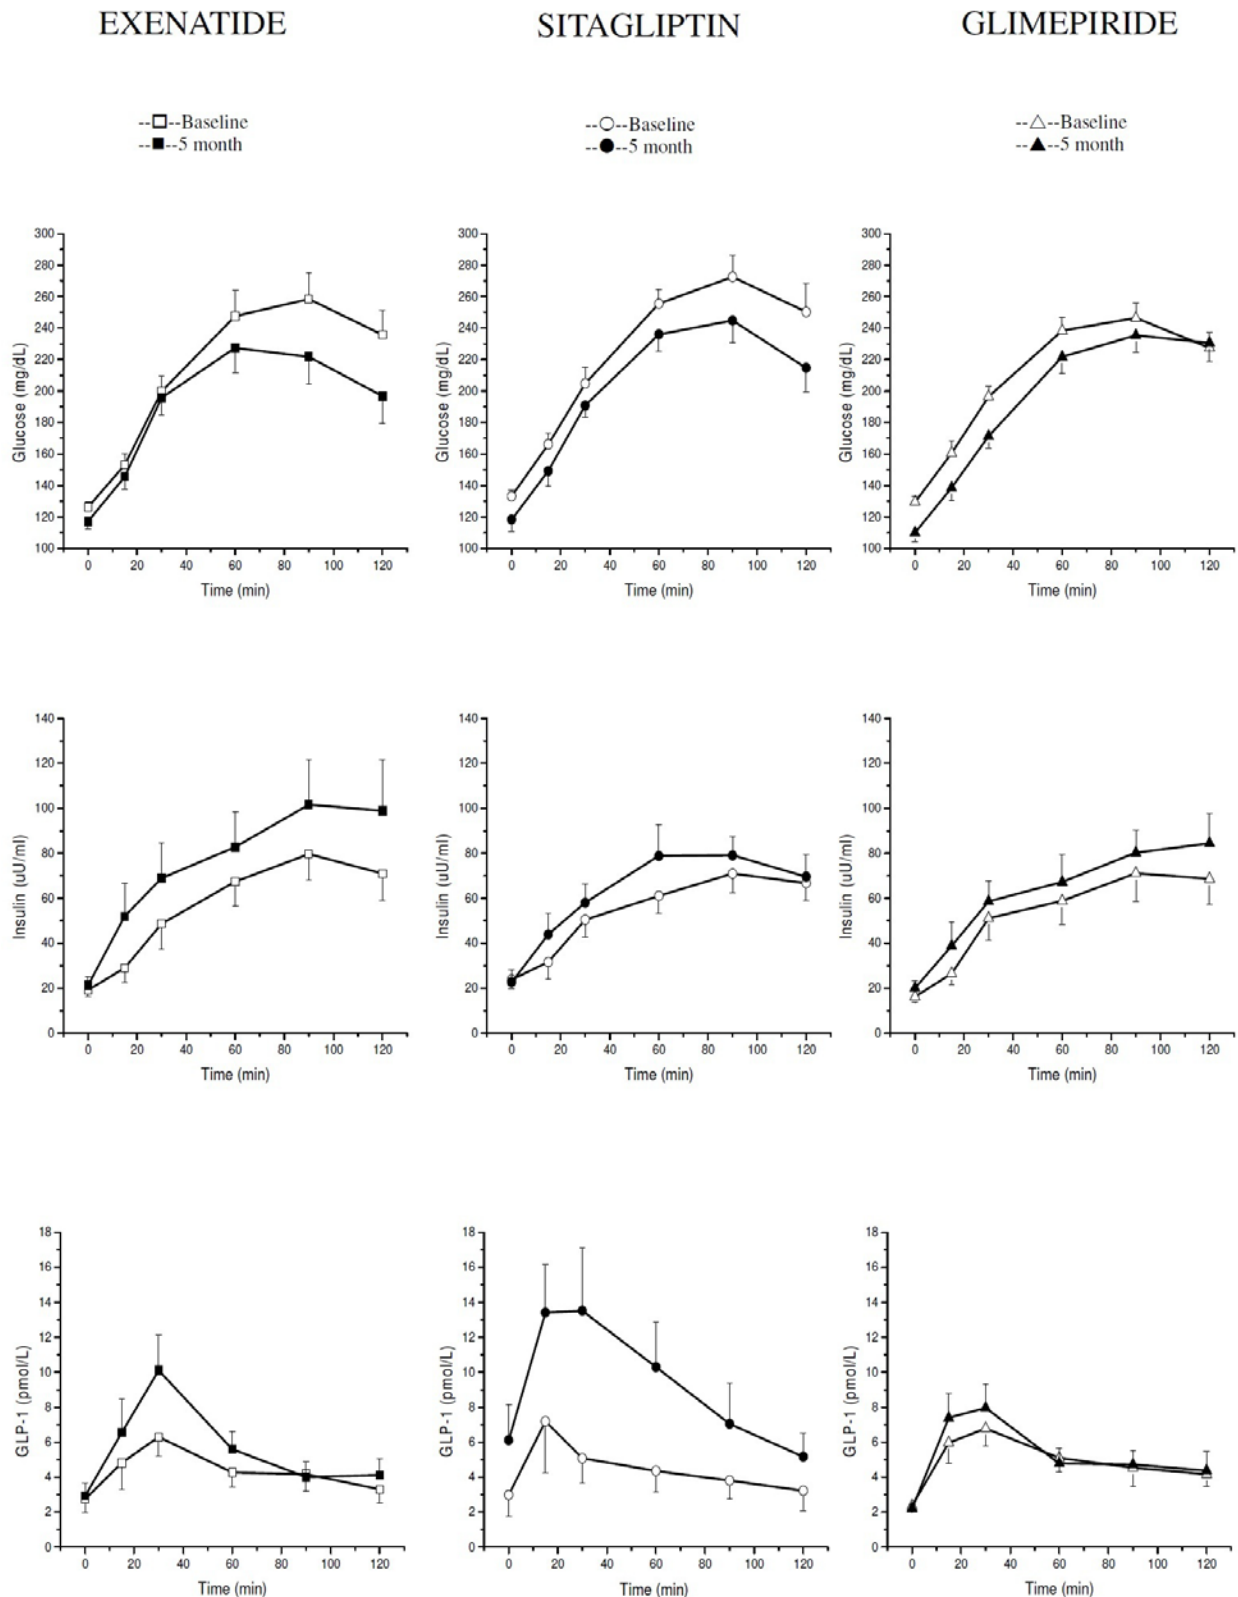

SUPPLEMENTARY DATA

**Supplementary Figure 3.** Plasma insulin (top panel), proinsulin (middle panel) and glucagon (bottom panel) during the glucose-potentiated arginine test at baseline (open) and after 5 days of washout following 6 months (black) of therapy with exenatide (left, squares), sitagliptin (middle, circles) or glimepiride (right, triangles) panel.

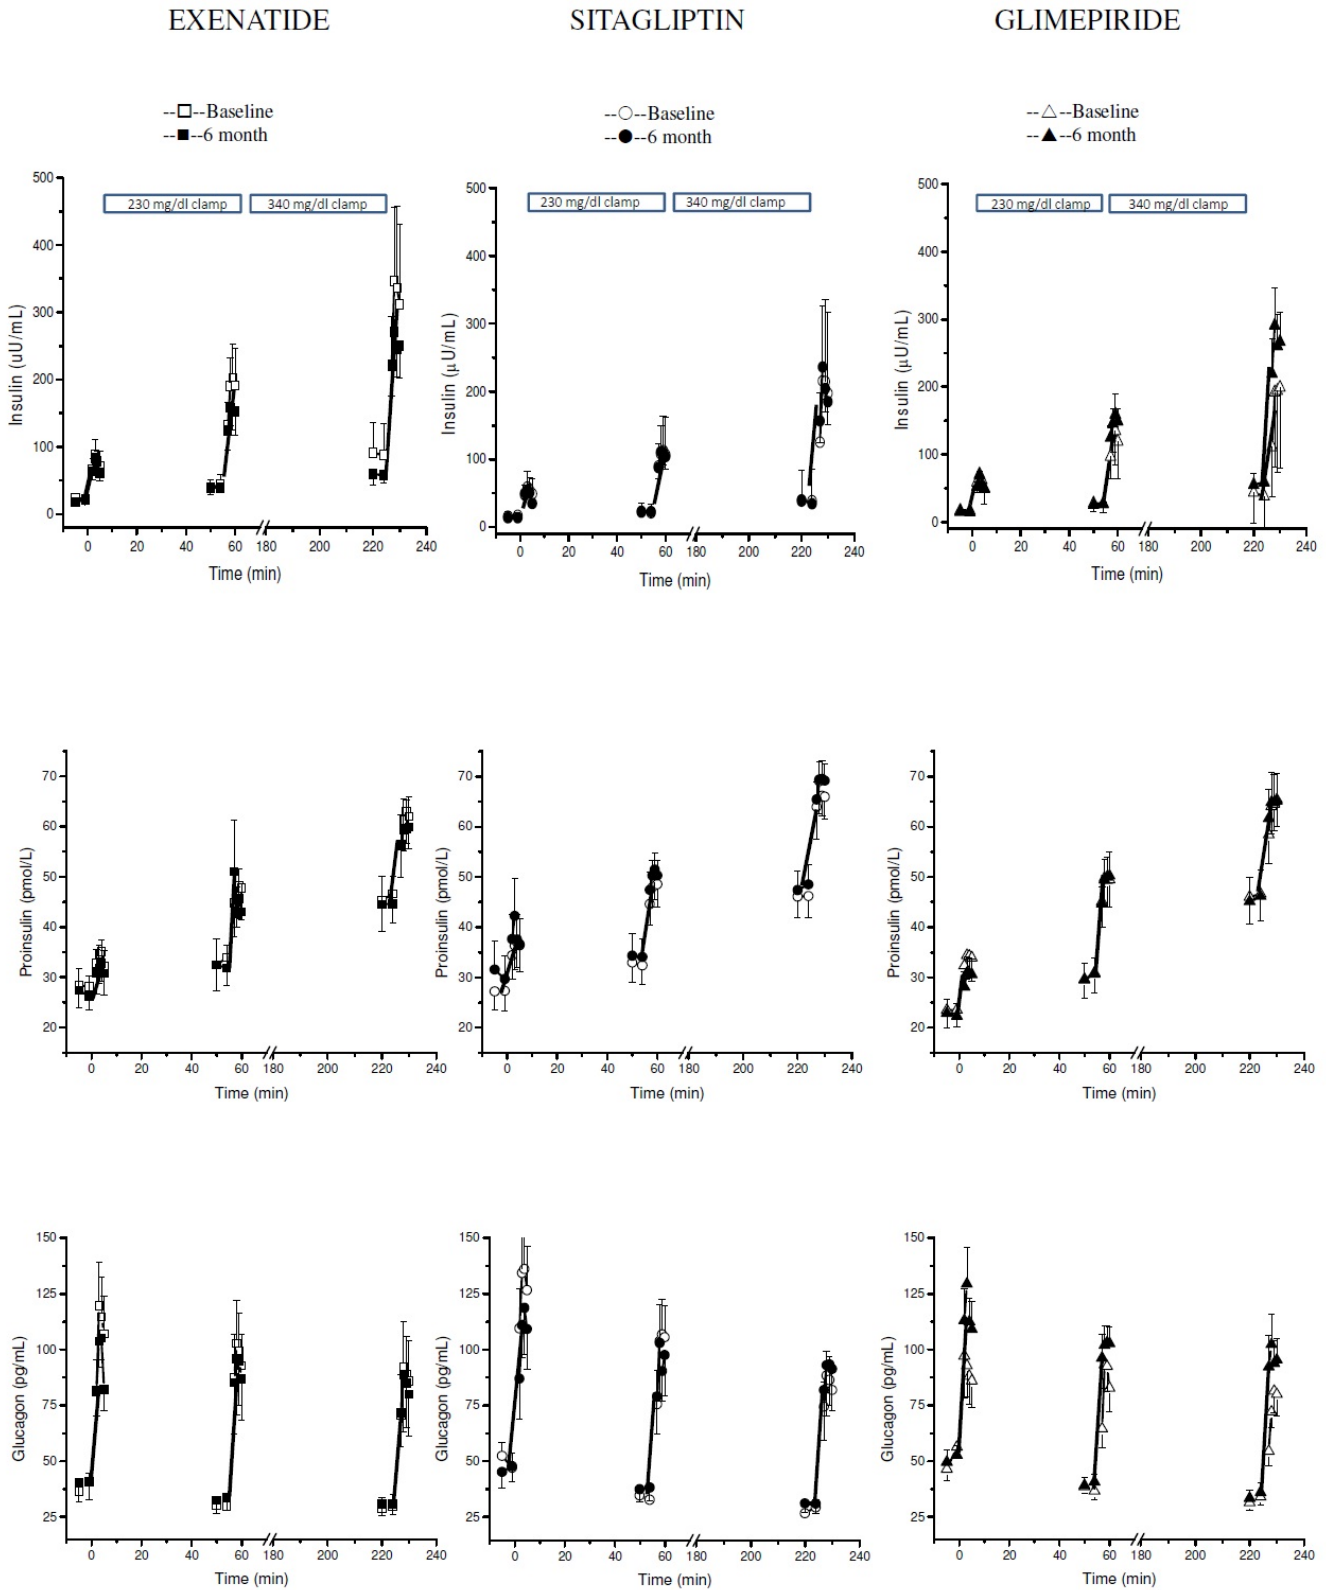

Supplement: supp_dc14-0398v140398_DC140398SupplementaryData.pdf [file supp_dc14-0398v140398_DC140398SupplementaryData.pdf]
